# Supplementary material for: Scholar 12 longitudinal outcomes: osteopathic research development application to facilitate scholarly activity during the pandemic and beyond
Source: publisher site journal article supplement (doi:10.1515/jom-2025-0041), 2025-06-04
Supplement: Supplementary file 1 [file j_jom-2025-0041_suppl_001.docx]

**LECOM Geriatrics/OPP Pre-Research Scholar 12 Self-Assessment**

1. Please rate your competency. Score how familiar you are with the following items on research and/or scholarly activity. *Abbreviations: CITI, Collaborative Institutional Training Initiative; IRB, Institutional Review Board.*

|  | Very unfamiliar | Know little | Know some | Familiar | Very familiar |
| --- | --- | --- | --- | --- | --- |
| Engagement in a laddered mentoring culture | ⃝ | ⃝ | ⃝ | ⃝ | ⃝ |
| Enjoyment of scholarly work | ⃝ | ⃝ | ⃝ | ⃝ | ⃝ |
| Research question(s) and hypothesis formulation | ⃝ | ⃝ | ⃝ | ⃝ | ⃝ |
| CITI Program requirements | ⃝ | ⃝ | ⃝ | ⃝ | ⃝ |
| IRB application | ⃝ | ⃝ | ⃝ | ⃝ | ⃝ |
| Grant development | ⃝ | ⃝ | ⃝ | ⃝ | ⃝ |
| Data collection systems and statistical analysis | ⃝ | ⃝ | ⃝ | ⃝ | ⃝ |
| Abstract development | ⃝ | ⃝ | ⃝ | ⃝ | ⃝ |
| Poster development | ⃝ | ⃝ | ⃝ | ⃝ | ⃝ |
| Manuscript development | ⃝ | ⃝ | ⃝ | ⃝ | ⃝ |
| Oral presentations at meetings/conferences | ⃝ | ⃝ | ⃝ | ⃝ | ⃝ |
| Case presentations and reports | ⃝ | ⃝ | ⃝ | ⃝ | ⃝ |

2. Please feel free to offer any additional comments on your understanding of scholarly activity and/or research.

|  |
| --- |
