# Supplementary material for: Scholar 12 longitudinal outcomes: osteopathic research development application to facilitate scholarly activity during the pandemic and beyond
Source: publisher site journal article supplement (doi:10.1515/jom-2025-0041), 2025-06-04
Supplement: Supplementary file 3 [file j_jom-2025-0041_suppl_003.docx]

**Scholar 12 Feedback Form**

| Categories | Excellent | Above Average | Below Average | No Credit |
| --- | --- | --- | --- | --- |
| Laddered mentoring | The instructions clearly helped me develop a ladder  ⃝ | The instructions mostly helped me develop a ladder  ⃝ | The instructions somewhat helped me, and I only partially developed a ladder  ⃝ | The instructions were not helpful, and I was unable to develop a ladder  ⃝ |
| *How can we improve?* |  |  |  |  |
| Enjoyment of process | The instructions clearly helped me enjoy scholarly work  ⃝ | The instructions mostly helped me enjoy scholarly work  ⃝ | The instructions were somewhat helpful, and I did not completely enjoy scholarly work  ⃝ | The instructions were not helpful, and I was unable to enjoy scholarly work  ⃝ |
| *How can we improve?* |  |  |  |  |
| Query | The instructions clearly helped me develop a logical query  ⃝ | The instructions mostly helped me develop a logical query  ⃝ | The instructions were somewhat helpful, and I only partially developed a logical query  ⃝ | The instructions were not helpful, and I was unable to develop a logical query  ⃝ |
| *How can we improve?* |  |  |  |  |
| IRB | The instructions clearly helped me access the IRB  ⃝ | The instructions mostly helped me access the IRB  ⃝ | The instructions were somewhat helpful, and I only partially accessed the IRB  ⃝ | The instructions were not helpful, and I was unable to access the IRB  ⃝ |
| *How can we improve?* |  |  |  |  |
| Proper grant | The instructions clearly helped me develop a grant  ⃝ | The instructions mostly helped me develop a grant  ⃝ | The instructions were somewhat helpful, and I only partially developed a grant  ⃝ | The instructions were not helpful, and I was unable to develop a grant  ⃝ |
| *How can we improve?* |  |  |  |  |
| Proper abstract | The instructions clearly helped me develop an abstract  ⃝ | The instructions mostly helped me develop an abstract  ⃝ | The instructions were somewhat helpful, and I only partially developed an abstract  ⃝ | The instructions were not helpful, and I was unable to develop an abstract  ⃝ |
| *How can we improve?* |  |  |  |  |
| Proper poster | The instructions clearly helped me develop a poster  ⃝ | The instructions mostly helped me develop a poster  ⃝ | The instructions were somewhat helpful, and I only partially developed a poster  ⃝ | The instructions were not helpful, and I was unable to develop a poster  ⃝ |
| *How can we improve?* |  |  |  |  |
| Proper manuscript | The instructions clearly helped me construct a manuscript  ⃝ | The instructions mostly helped me construct a manuscript  ⃝ | The instructions were somewhat helpful, and I only partially constructed a manuscript  ⃝ | The instructions were not helpful, and I was unable to construct a manuscript  ⃝ |
| *How can we improve?* |  |  |  |  |
| Proper oral presentation | The instructions clearly helped me construct an oral presentation  ⃝ | The instructions mostly helped me construct an oral presentation  ⃝ | The instructions were somewhat helpful, and I only partially constructed an oral presentation  ⃝ | The instructions were not helpful, and I was unable to construct an oral presentation  ⃝ |
| *How can we improve?* |  |  |  |  |
