# Supplementary material for: Scholar 12 longitudinal outcomes: osteopathic research development application to facilitate scholarly activity during the pandemic and beyond
Source: publisher site journal article supplement (doi:10.1515/jom-2025-0041), 2025-06-04
Supplement: Supplementary file 6 [file j_jom-2025-0041_suppl_004.docx]

**Scholar 12 Assessment Form**

| Categories | Knows | Knows How | Shows How | Does |
| --- | --- | --- | --- | --- |
| Laddered mentoring | The learner can point to resources that demonstrates the philosophy  ⃝ | The learner can verbalize the concept of teamwork from student to physician ⃝ | The learner collects required components of the ladder  ⃝ | The learner actively participates and completes role in the ladder  ⃝ |
| Enjoyment of process | The learner views others enjoying scholar work  ⃝ | The learner realizes that the process should be fun  ⃝ | The learner starts to participate in a happy manner  ⃝ | The learner thoroughly enjoys the process with laughter and/or smiles  ⃝ |
| Query | The learner knows there are things to research  ⃝ | The learner knows what is available  ⃝ | The learner actively develops hypotheses from the environment ⃝ | The learner proposes a single hypothesis from which to create scholarly work ⃝ |
| IRB | The learner knows the importance of IRB  ⃝ | The learner knows how to access IRB  ⃝ | The learner demonstrates the ability to complete a draft of an IRB application  ⃝ | The learner organizes data and completes an IRB application  ⃝ |
| Proper grant | The learner understands the reason and design for a grant  ⃝ | The learner knows how to create a grant from data collected  ⃝ | The learner begins to assemble the components of a grant  ⃝ | The learner completes a proper grant ready for submission  ⃝ |
| Proper abstract | The learner understands the reason and design for an abstract  ⃝ | The learner knows how to create an abstract from data collected  ⃝ | The learner begins to assemble the components of an abstract  ⃝ | The learner completes a proper abstract ready for submission  ⃝ |
| Proper poster | The learner understands the reason and design for a poster  ⃝ | The learner knows how to create a poster from data collected  ⃝ | The learner begins to assemble the components of a poster  ⃝ | The learner completes a proper poster ready for submission  ⃝ |
| Proper manuscript | The learner understands the reason and design for a manuscript  ⃝ | The learner knows how to create a manuscript from data collected  ⃝ | The learner begins to assemble the components of a manuscript  ⃝ | The learner completes a proper manuscript ready for submission  ⃝ |
| Proper oral presentation | The learner understands the reason and design for an oral presentation  ⃝ | The learner knows how to create an oral presentation from data collected  ⃝ | The learner begins to assemble the components of an oral presentation  ⃝ | The learner completes a proper oral presentation ready for delivery  ⃝ |
